# Supplementary material
Source: PubMed Central journal article supplement (PMC3400418)
Supplement: ismej20125x1.pdf [file ismej20125x1.pdf]

Supplementary Table 1. Recoveries of carbon and electrons for two *F. prausnitzii* strains grown in batch culture under different conditions.

|                                | Reactants |          |           | Products   |             |           |          |           |                 |           |           | Leftover Substrate#     |             | Net Recovery (%) |             |                       |
|--------------------------------|-----------|----------|-----------|------------|-------------|-----------|----------|-----------|-----------------|-----------|-----------|-------------------------|-------------|------------------|-------------|-----------------------|
|                                | Reactants | Acetate  | Fumarate  | Biomass    | Net Acetate | Lactate   | Formate  | Butyrate  | CO <sub>2</sub> | Succinate | Malate    | O <sub>2</sub> consumed | Glucose     | Fumarate         | Metabolites | Metabolites + Biomass |
| <b>No. of carbon/mol</b>       | <b>6</b>  | <b>2</b> | <b>4</b>  | <b>1</b>   | <b>2</b>    | <b>3</b>  | <b>1</b> | <b>4</b>  | <b>1</b>        | <b>4</b>  | <b>4</b>  |                         | <b>6,0</b>  | <b>4,0</b>       |             |                       |
| <b>No. of electron/mol</b>     | <b>24</b> | <b>8</b> | <b>12</b> | <b>5,5</b> | <b>8</b>    | <b>12</b> | <b>2</b> | <b>20</b> | <b>0</b>        | <b>14</b> | <b>12</b> |                         | <b>24,0</b> | <b>12,0</b>      |             |                       |
| <b>YCFAG10*</b>                |           |          |           |            |             |           |          |           |                 |           |           |                         |             |                  |             |                       |
| <b>HTF-F</b>                   |           |          |           |            |             |           |          |           |                 |           |           |                         |             |                  |             |                       |
| Conc (mM)                      | 10        | 10,2     |           | 11,20      | 4,1         | 1,1       | 3,1      | 10,6      | 16,0            |           |           |                         | <b>0,0</b>  |                  |             |                       |
| Carbon (mM)                    | 60        | 20,4     |           | 11,2       | 8,2         | 3,3       | 3,1      | 42,4      | 16,0            |           |           |                         |             |                  | 91          | 105                   |
| Electrons                      | 240       | 81,6     |           | 61,6       | 32,8        | 13,2      | 6,2      | 212,0     | 0,0             |           |           |                         |             |                  | 82          | 101                   |
| <b>A2-165</b>                  |           |          |           |            |             |           |          |           |                 |           |           |                         |             |                  |             |                       |
| Conc (mM)                      | 10        | 10,2     |           | 12,80      | 7,7         | 0,5       | 12,4     | 9,8       | 7,0             |           |           |                         | <b>0,0</b>  |                  |             |                       |
| Carbon (mM)                    | 60        | 20       |           | 12,8       | 15,4        | 1,5       | 12,4     | 39,2      | 7,0             |           |           |                         |             |                  | 94          | 110                   |
| Electrons                      | 240       | 82       |           | 70,4       | 61,6        | 6,0       | 24,9     | 196,0     | 0,0             |           |           |                         |             |                  | 90          | 112                   |
| <b>YCFAG (O<sub>2</sub>)**</b> |           |          |           |            |             |           |          |           |                 |           |           |                         |             |                  |             |                       |
| <b>HTF-F</b>                   |           |          |           |            |             |           |          |           |                 |           |           |                         |             |                  |             |                       |
| Conc (mM)                      | 25        | 33,0     |           | 7,20       | 25,6        | 1,9       | 0,0      | 3,7       | 20,0            |           |           | 13,0                    | 19,2        |                  |             |                       |
| Carbon (mM)                    | 150       | 66       |           | 7,2        | 51,2        | 5,7       | 0,0      | 14,8      | 20,0            |           |           |                         | 115,2       |                  | 96          | 99                    |
| Electrons                      | 600       | 264      |           | 39,6       | 204,8       | 22,8      | 0,0      | 74,0      | 0,0             |           |           | 52                      | 460,8       |                  | 94          | 99                    |
| <b>A2-165</b>                  |           |          |           |            |             |           |          |           |                 |           |           |                         |             |                  |             |                       |
| Conc (mM)                      | 25        | 33,0     |           | 7,60       | 27,3        | 0,2       | 0,0      | 2,5       | 24,0            |           |           | 13,0                    | 19,5        |                  |             |                       |
| Carbon (mM)                    | 150       | 66       |           | 7,6        | 54,6        | 0,7       | 0,0      | 10,0      | 24,0            |           |           |                         | 117,0       |                  | 95          | 99                    |
| Electrons                      | 600       | 264      |           | 41,8       | 218,3       | 2,8       | 0,0      | 50,0      | 0,0             |           |           | 52                      | 468,0       |                  | 92          | 96                    |
| <b>YCFAG(fum)***</b>           |           |          |           |            |             |           |          |           |                 |           |           |                         |             |                  |             |                       |
| <b>HTF-F</b>                   |           |          |           |            |             |           |          |           |                 |           |           |                         |             |                  |             |                       |
| Conc (mM)                      | 10        | 8,6      | 55,4      | 14,40      | 13,0        | 2,5       | 2,4      | 9,1       | 31,0            | 24,6      | 2,4       |                         | 0,0         | 23,1             |             |                       |
| Carbon (mM)                    | 60        | 17       | 222       | 14,4       | 26,0        | 7,5       | 2,4      | 36,4      | 31,0            | 98,4      | 9,6       |                         | 0,0         | 92,4             | 102         | 106                   |
| Electrons                      | 240       | 69       | 665       | 79,2       | 104,0       | 30,0      | 4,8      | 182,0     | 0,0             | 344,4     | 28,8      |                         | 0,0         | 277,2            | 100         | 108                   |
| <b>A2-165</b>                  |           |          |           |            |             |           |          |           |                 |           |           |                         |             |                  |             |                       |
| Conc (mM)                      | 10        | 8,6      | 55,4      | 20,40      | 28,0        | 2,5       | 11,0     | 3,3       | 29,0            | 37,5      | 2,2       |                         | 0,0         | 8,1              |             |                       |
| Carbon (mM)                    | 60        | 17       | 222       | 20,4       | 56,0        | 7,5       | 11,0     | 13,2      | 29,0            | 150,0     | 8,8       |                         | 0,0         | 32,4             | 103         | 110                   |
| Electrons                      | 240       | 69       | 665       | 112,2      | 224,0       | 30,0      | 22,0     | 66,0      | 0,0             | 525,0     | 26,4      |                         | 0,0         | 97,2             | 102         | 113                   |

\* YCFAG medium (3) with 10mM of glucose as carbon source and a nitrogen gas phase

\*\* YCFAG medium with an oxygen gas phase

\*\*\* YCFAG10 medium with 55 mM fumarate as terminal electron acceptor and a nitrogen gas phase

# Substrate left after the end of batch culture experiment
